# Supplementary material
Source: MDPI journal article supplement (https://www.mdpi.com/2071-1050/16/5/2213)
Supplement: s1 [file s1]

# Perceptions from member-consumers of a University Community for sustainable and healthy eating: Evidence from Greece

Athina Mastora <sup>1</sup>, Fotios Chatzitheodoridis <sup>2</sup> and Dimitris Skalkos <sup>1,\*</sup>

<sup>1</sup> Laboratory of Food Chemistry, Department of Chemistry, University of Ioannina, 45110 Ioannina, Greece; [pch01443@uoi.gr](mailto:pch01443@uoi.gr) (A.M)

<sup>2</sup> Department of Management Science and Technology, University of Western Macedonia, 50100 Kozani, Greece; [fxtheodoridis@uowm.gr](mailto:fxtheodoridis@uowm.gr)

Correspondence: [dskalkos@uoi.gr](mailto:dskalkos@uoi.gr); Tel.: +30-2651008345

Supplementary material

**Table S1.** Questionnaire on consumers' perceptions about sustainable "healthy eating" and "healthy eating advertisements" in Greece today

| Demographics              |  |
|---------------------------|--|
| <b>1. Sex</b>             |  |
| Male                      |  |
| Female                    |  |
| <b>2. Age</b>             |  |
| 18-25                     |  |
| 26-35                     |  |
| 36-55                     |  |
| 46-55                     |  |
| 56+                       |  |
| <b>3. Civil state</b>     |  |
| Single                    |  |
| Married                   |  |
| Divorced                  |  |
| <b>4. Job situation</b>   |  |
| Employee                  |  |
| Unemployed                |  |
| Student                   |  |
| Retired                   |  |
| <b>5. Education level</b> |  |
| None / Primary School     |  |
| Secondary School          |  |
| High School               |  |
| University                |  |

Choose in the scale between «Not all important» and «Very important» regarding the following sentences.

(Mark your answer with X).

### 1. FOR ME, HEALTH IS MAINLY ABOUT

|                                                    | Not all<br>important       | Less<br>important          | Moderately<br>important    | Quit<br>important          | Very<br>important          |
|----------------------------------------------------|----------------------------|----------------------------|----------------------------|----------------------------|----------------------------|
| 1. Keeping the body in good condition (fitness)    | 1 <input type="checkbox"/> | 2 <input type="checkbox"/> | 3 <input type="checkbox"/> | 4 <input type="checkbox"/> | 5 <input type="checkbox"/> |
| 2. Having the energy to do the things I want to do | 1 <input type="checkbox"/> | 2 <input type="checkbox"/> | 3 <input type="checkbox"/> | 4 <input type="checkbox"/> | 5 <input type="checkbox"/> |
| 3. Having no physical health problems              | 1 <input type="checkbox"/> | 2 <input type="checkbox"/> | 3 <input type="checkbox"/> | 4 <input type="checkbox"/> | 5 <input type="checkbox"/> |
| 4. Looking good                                    | 1 <input type="checkbox"/> | 2 <input type="checkbox"/> | 3 <input type="checkbox"/> | 4 <input type="checkbox"/> | 5 <input type="checkbox"/> |
| 5. Protecting my body against harmful influences   | 1 <input type="checkbox"/> | 2 <input type="checkbox"/> | 3 <input type="checkbox"/> | 4 <input type="checkbox"/> | 5 <input type="checkbox"/> |
| 6. Emotional well-being, feeling good mentally     | 1 <input type="checkbox"/> | 2 <input type="checkbox"/> | 3 <input type="checkbox"/> | 4 <input type="checkbox"/> | 5 <input type="checkbox"/> |

### 2. DEFINITION OF “HEALTHY EATING”

|                                                                                                                        | Not all<br>important       | Less<br>important          | Moderately<br>important    | Quit<br>important          | Very<br>important          |
|------------------------------------------------------------------------------------------------------------------------|----------------------------|----------------------------|----------------------------|----------------------------|----------------------------|
| 1. Eating vegetables and fresh fruit                                                                                   | 1 <input type="checkbox"/> | 2 <input type="checkbox"/> | 3 <input type="checkbox"/> | 4 <input type="checkbox"/> | 5 <input type="checkbox"/> |
| 2. Balanced diet/eating food from all five food groups (fruits & vegetables, grains, protein foods and dairy products) | 1 <input type="checkbox"/> | 2 <input type="checkbox"/> | 3 <input type="checkbox"/> | 4 <input type="checkbox"/> | 5 <input type="checkbox"/> |
| 3. Eating to stay healthy                                                                                              | 1 <input type="checkbox"/> | 2 <input type="checkbox"/> | 3 <input type="checkbox"/> | 4 <input type="checkbox"/> | 5 <input type="checkbox"/> |
| 4. Not eating junk food                                                                                                | 1 <input type="checkbox"/> | 2 <input type="checkbox"/> | 3 <input type="checkbox"/> | 4 <input type="checkbox"/> | 5 <input type="checkbox"/> |
| 5. Eating vitamins                                                                                                     | 1 <input type="checkbox"/> | 2 <input type="checkbox"/> | 3 <input type="checkbox"/> | 4 <input type="checkbox"/> | 5 <input type="checkbox"/> |

|                   |                            |                            |                            |                            |                            |
|-------------------|----------------------------|----------------------------|----------------------------|----------------------------|----------------------------|
| 6. Eating protein | 1 <input type="checkbox"/> | 2 <input type="checkbox"/> | 3 <input type="checkbox"/> | 4 <input type="checkbox"/> | 5 <input type="checkbox"/> |
|-------------------|----------------------------|----------------------------|----------------------------|----------------------------|----------------------------|

### 3. INFLUENCES ON HEALTHY EATING

|                                   | Not all important          | Less important             | Moderately important       | Quit important             | Very important             |
|-----------------------------------|----------------------------|----------------------------|----------------------------|----------------------------|----------------------------|
| 1. Food manufacturers             | 1 <input type="checkbox"/> | 2 <input type="checkbox"/> | 3 <input type="checkbox"/> | 4 <input type="checkbox"/> | 5 <input type="checkbox"/> |
| 2. Supermarkets                   | 1 <input type="checkbox"/> | 2 <input type="checkbox"/> | 3 <input type="checkbox"/> | 4 <input type="checkbox"/> | 5 <input type="checkbox"/> |
| 3. Fast-food restaurants          | 1 <input type="checkbox"/> | 2 <input type="checkbox"/> | 3 <input type="checkbox"/> | 4 <input type="checkbox"/> | 5 <input type="checkbox"/> |
| 4. Food packaging                 | 1 <input type="checkbox"/> | 2 <input type="checkbox"/> | 3 <input type="checkbox"/> | 4 <input type="checkbox"/> | 5 <input type="checkbox"/> |
| 5. Government                     | 1 <input type="checkbox"/> | 2 <input type="checkbox"/> | 3 <input type="checkbox"/> | 4 <input type="checkbox"/> | 5 <input type="checkbox"/> |
| 6. Family and friends             | 1 <input type="checkbox"/> | 2 <input type="checkbox"/> | 3 <input type="checkbox"/> | 4 <input type="checkbox"/> | 5 <input type="checkbox"/> |
| 7. Doctor or health care provider | 1 <input type="checkbox"/> | 2 <input type="checkbox"/> | 3 <input type="checkbox"/> | 4 <input type="checkbox"/> | 5 <input type="checkbox"/> |

### 4. SOURCES OF INFORMATION ABOUT HEALTHY EATING

|                                 | Not all important          | Less important             | Moderately important       | Quit important             | Very important             |
|---------------------------------|----------------------------|----------------------------|----------------------------|----------------------------|----------------------------|
| 1. Books, Magazines, Newspapers | 1 <input type="checkbox"/> | 2 <input type="checkbox"/> | 3 <input type="checkbox"/> | 4 <input type="checkbox"/> | 5 <input type="checkbox"/> |
| 2. Internet                     | 1 <input type="checkbox"/> | 2 <input type="checkbox"/> | 3 <input type="checkbox"/> | 4 <input type="checkbox"/> | 5 <input type="checkbox"/> |
| 3. Commonsense/upbringing       | 1 <input type="checkbox"/> | 2 <input type="checkbox"/> | 3 <input type="checkbox"/> | 4 <input type="checkbox"/> | 5 <input type="checkbox"/> |

|                                        |                            |                            |                            |                            |                            |
|----------------------------------------|----------------------------|----------------------------|----------------------------|----------------------------|----------------------------|
| 4. School/University                   | 1 <input type="checkbox"/> | 2 <input type="checkbox"/> | 3 <input type="checkbox"/> | 4 <input type="checkbox"/> | 5 <input type="checkbox"/> |
| 5. Professionals (doctors, dietitians) | 1 <input type="checkbox"/> | 2 <input type="checkbox"/> | 3 <input type="checkbox"/> | 4 <input type="checkbox"/> | 5 <input type="checkbox"/> |
| 6. Don't use any sources               | 1 <input type="checkbox"/> | 2 <input type="checkbox"/> | 3 <input type="checkbox"/> | 4 <input type="checkbox"/> | 5 <input type="checkbox"/> |

## 5. OBJECTIVES OF ADVERTISEMENTS ON HEALTHY FOOD

|                                | Not all important          | Less important             | Moderately important       | Quit important             | Very important             |
|--------------------------------|----------------------------|----------------------------|----------------------------|----------------------------|----------------------------|
| 1. Aim is to inform            | 1 <input type="checkbox"/> | 2 <input type="checkbox"/> | 3 <input type="checkbox"/> | 4 <input type="checkbox"/> | 5 <input type="checkbox"/> |
| 2. Essential information       | 1 <input type="checkbox"/> | 2 <input type="checkbox"/> | 3 <input type="checkbox"/> | 4 <input type="checkbox"/> | 5 <input type="checkbox"/> |
| 3. Concerned with making money | 1 <input type="checkbox"/> | 2 <input type="checkbox"/> | 3 <input type="checkbox"/> | 4 <input type="checkbox"/> | 5 <input type="checkbox"/> |
| 4. Consumers' best interests   | 1 <input type="checkbox"/> | 2 <input type="checkbox"/> | 3 <input type="checkbox"/> | 4 <input type="checkbox"/> | 5 <input type="checkbox"/> |

## 6. SUITABLE ORGANISATIONS FOR DEVELOPING AND RUNNING HEALTHY EATING CAMPAIGNS

|                                        | Not all important          | Less important             | Moderately important       | Quit important             | Very important             |
|----------------------------------------|----------------------------|----------------------------|----------------------------|----------------------------|----------------------------|
| 1. Non-government health organisations | 1 <input type="checkbox"/> | 2 <input type="checkbox"/> | 3 <input type="checkbox"/> | 4 <input type="checkbox"/> | 5 <input type="checkbox"/> |
| 2. The government                      | 1 <input type="checkbox"/> | 2 <input type="checkbox"/> | 3 <input type="checkbox"/> | 4 <input type="checkbox"/> | 5 <input type="checkbox"/> |
| 3. Food manufacturers                  | 1 <input type="checkbox"/> | 2 <input type="checkbox"/> | 3 <input type="checkbox"/> | 4 <input type="checkbox"/> | 5 <input type="checkbox"/> |

|                        |                            |                            |                            |                            |                            |
|------------------------|----------------------------|----------------------------|----------------------------|----------------------------|----------------------------|
| 4. Supermarkets        | 1 <input type="checkbox"/> | 2 <input type="checkbox"/> | 3 <input type="checkbox"/> | 4 <input type="checkbox"/> | 5 <input type="checkbox"/> |
| 5. Fast food retailers | 1 <input type="checkbox"/> | 2 <input type="checkbox"/> | 3 <input type="checkbox"/> | 4 <input type="checkbox"/> | 5 <input type="checkbox"/> |

#### 7. WHO SHOULD BE RESPONSIBLE FOR REGULATING HEALTHY EATING CAMPAIGNS?

|                          | Not all<br>important       | Less<br>important          | Moderately<br>important    | Quit<br>important          | Very<br>important          |
|--------------------------|----------------------------|----------------------------|----------------------------|----------------------------|----------------------------|
| 1. Government            | 1 <input type="checkbox"/> | 2 <input type="checkbox"/> | 3 <input type="checkbox"/> | 4 <input type="checkbox"/> | 5 <input type="checkbox"/> |
| 2. Independent bodies    | 1 <input type="checkbox"/> | 2 <input type="checkbox"/> | 3 <input type="checkbox"/> | 4 <input type="checkbox"/> | 5 <input type="checkbox"/> |
| 3. Medical professionals | 1 <input type="checkbox"/> | 2 <input type="checkbox"/> | 3 <input type="checkbox"/> | 4 <input type="checkbox"/> | 5 <input type="checkbox"/> |
| 4. Health organizations  | 1 <input type="checkbox"/> | 2 <input type="checkbox"/> | 3 <input type="checkbox"/> | 4 <input type="checkbox"/> | 5 <input type="checkbox"/> |
